# Supplementary material
Source: publisher figshare collection journal article supplement (https://acs.figshare.com/ndownloader/files/3588681)
Supplement: Supplementary file 1 [file 3588681]

**Part 1.** Result of instrument examination on the synthesized SBA-15 adsorbent.

- a. XRD pattern of SBA-15 adsorbent
- b. TEM photo of SBA-15 adsorbent
- c. SEM photo of SBA-15 adsorbent

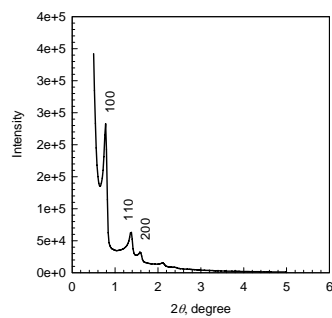

a

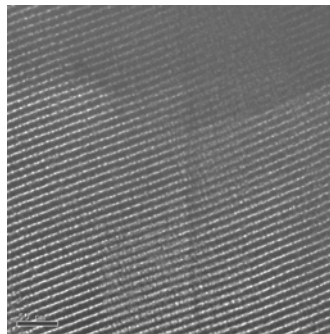

b

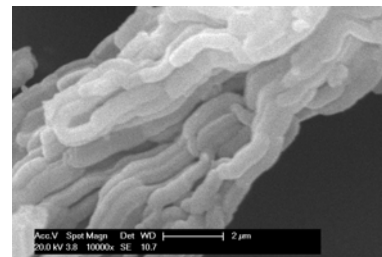

c
